# Supplementary material
Source: PubMed Central journal article supplement (PMC3122209)
Supplement: supp_M110.207951_jbc.M110.207951-1.pdf [file supp_M110.207951_jbc.M110.207951-1.pdf]

**Table S1. Primer Sequences**

| Primer                                    | Sequence                        | Product size |
|-------------------------------------------|---------------------------------|--------------|
| Primers used for semi-quantitative RT-PCR |                                 |              |
| <i>mAdam12</i> (F)                        | 5'-TAAAACGTACAGCTTAGAGC-3'      | 300bp        |
| <i>mAdam12</i> (R)                        | 5'-CTTGTCAACGTGATTGGCGATCTC-3'  |              |
| <i>mGapdh</i> (F)                         | 5'-TCGGTGTGAACGGATTTG-3'        | 228bp        |
| <i>mGapdh</i> (R)                         | 5'-GGTCTCGCTCCTGGAAGA-3'        |              |
| <i>hADAM12L</i> (F)                       | 5'-GTTTGGCTTTGGAGGAAGCACAG-3'   | 514bp        |
| <i>hADAM12L</i> (R)                       | 5'-TGCAGGCAGAGGCTTCTGAGG-3'     |              |
| <i>hADAM12S</i> (F)                       | 5'-CAAGGAGGCCGGATTCTG TG-3'     | 393bp        |
| <i>hADAM12S</i> (R)                       | 5'-TCAGATGAGTGTGTCAGTGA-3'      |              |
| <i>hβ-ACTIN</i> (F)                       | 5'-GCTCGCGTCGACAACGGCTC-3'      | 353bp        |
| <i>hβ-ACTIN</i> (R)                       | 5'-CAAACATGATCTGGGTCATCTTCTC-3' |              |
| Primers used for real-time qRT-PCR        |                                 |              |
| <i>mAdam12</i> (F)                        | 5'-GGATGTGCCTCTTCAACCTAC-3'     | 134bp        |
| <i>mAdam12</i> (R)                        | 5'-AGCGTTACAGCAGCGATTTC-3'      |              |
| <i>mα-Tubulin</i> (F)                     | 5'-AAACAGGTTGATAGGTCAAA-3'      | 121bp        |
| <i>mα-Tubulin</i> (R)                     | 5'-GAAGTGGATACGAGGGTAGG-3'      |              |
